# Supplementary material for: A multi-model analysis of change in potential yield of major crops in China under climate change
Source: Copernicus journal article supplement (doi:10.5194/esd-6-45-2015), 2015-02-10
Supplement: Supplementary file 1 [file esd-6-45-2015-supplement.pdf]

Supplement of Earth Syst. Dynam., 6, 45–59, 2015  
<http://www.earth-syst-dynam.net/6/45/2015/>  
doi:10.5194/esd-6-45-2015-supplement  
© Author(s) 2015. CC Attribution 3.0 License.

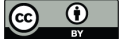

*Supplement of*

## **A multi-model analysis of change in potential yield of major crops in China under climate change**

**Y. Yin et al.**

*Correspondence to:* Q. Tang (tangqh@igsnr.ac.cn)

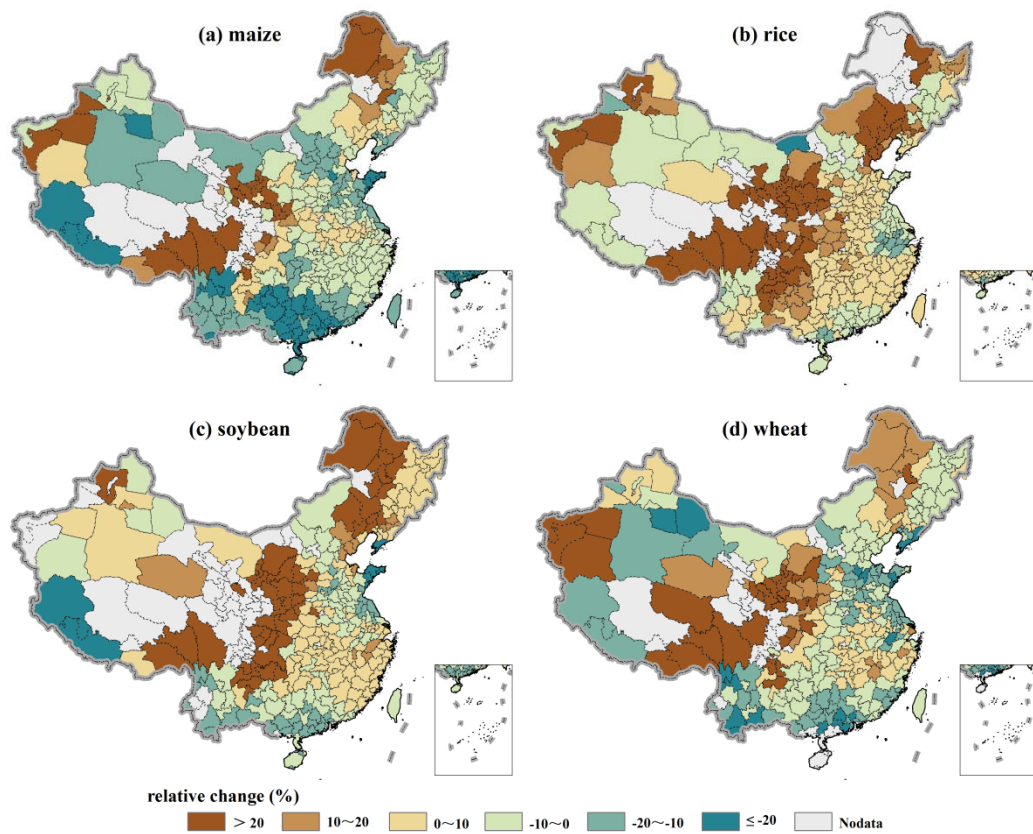

Fig. S1 The MMs of the relative change of the simulated yield of maize (a), rice (b), soybean (c), and wheat (d) with the CO<sub>2</sub> effect at the end of the 21<sup>st</sup> century (2070-2099) comparing with the simulated yield in the historical period (1981-2010) at the prefecture-level cities of China

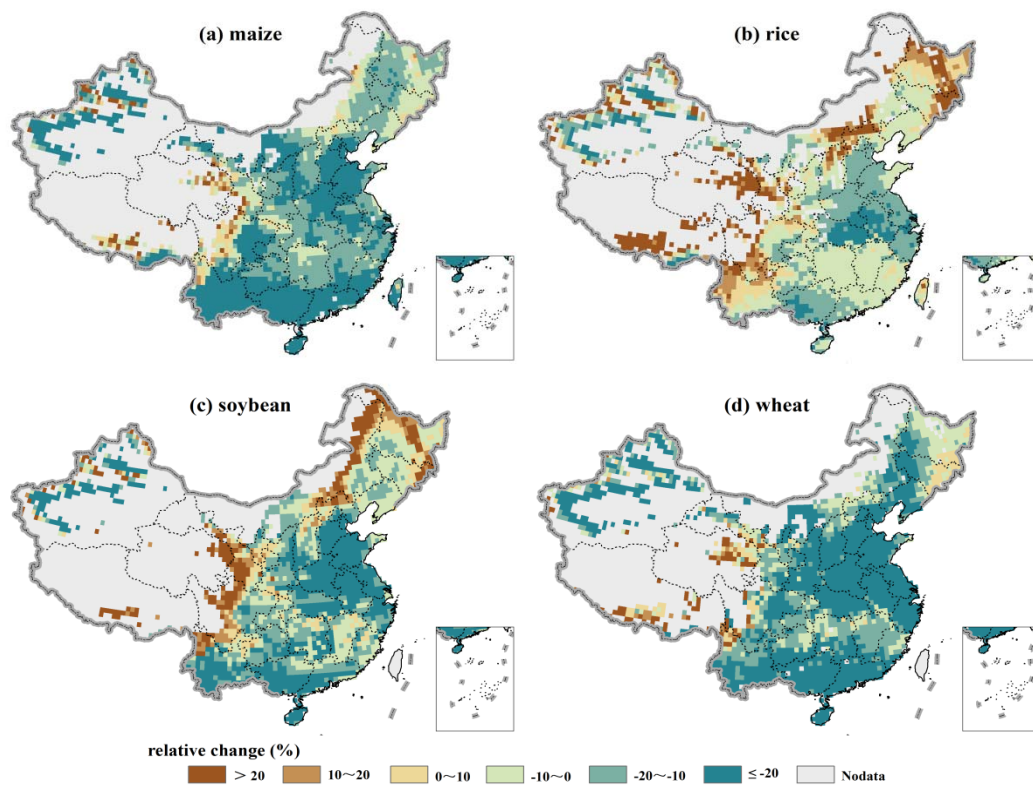

Fig. S2 The 25<sup>th</sup> percentiles of the relative change of the simulated yield of maize (a), rice (b), soybean (c), and wheat (d) with the CO<sub>2</sub> effect at the end of the 21<sup>st</sup> century (2070-2099) comparing with the simulated yield in the historical period (1981-2010)

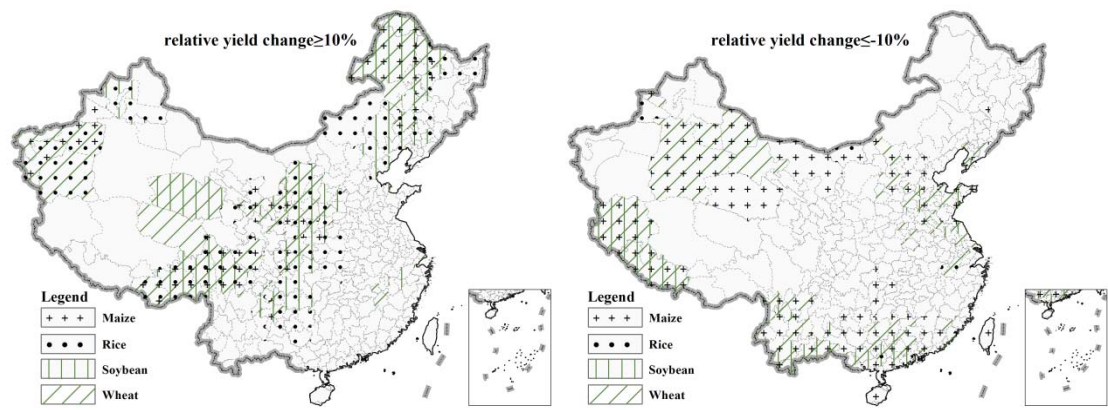

Fig. S3 The high climate resilience areas (left column) and high climate risk areas (right column) for the major crops in China at the prefecture-level cities
